# Tuning intrinsic disorder predictors for virus proteins

Gal Almog<sup>1,\*</sup>, Abayomi S Olabode<sup>1,\*,†</sup>, Art FY Poon<sup>1,2,3</sup>

\* denotes equal contribution

† corresponding author

<sup>1</sup>Department of Pathology & Laboratory Medicine, Western University, London, Canada;

<sup>2</sup>Department of Applied Mathematics, Western University, London, Canada;

<sup>3</sup>Department of Microbiology & Immunology, Western University, London, Canada

## Abstract

Many virus-encoded proteins have intrinsically disordered regions that lack a stable folded three-dimensional structure. These disordered proteins often play important functional roles in virus replication, such as down-regulating host defense mechanisms. With the widespread availability of next-generation sequencing, the number of new virus genomes with predicted open reading frames is rapidly outpacing our capacity for directly characterizing protein structures through crystallography. Hence, computational methods for structural prediction play an important role. A large number of predictors focus on the problem of classifying residues into ordered and disordered regions, and these methods tend to be validated on a diverse training set of proteins from eukaryotes, prokaryotes and viruses. In this study, we investigate whether some predictors outperform others in the context of virus proteins. We evaluate the prediction accuracy of 21 methods, many of which are only available as web applications, on a curated set of 126 proteins encoded by viruses. Furthermore, we apply a random forest classifier to these predictor outputs. Based on cross-validation experiments, this ensemble approach confers a substantial improvement in accuracy, *e.g.*, a mean 36% gain in Matthews correlation coefficient. Lastly, we apply the random forest predictor to SARS-CoV-2 ORF6, an accessory gene that encodes a short (61 AA) and moderately disordered protein that inhibits the host innate immune response.

# Introduction

For almost a century, it was assumed that proteins required a properly folded and stable three-dimensional or tertiary structure in order to function [1–3]. More recently, it has become evident that many proteins and protein regions are disordered, which are referred to as intrinsically disordered proteins (IDPs) and intrinsically disordered protein regions (IDPRs), respectively. Both IDPs and IDPRs can perform important biological functions despite lacking a properly folded and stable tertiary structure [2, 4].

These kinds of proteins are an important area of research because they play major roles in cell regulation, signalling, differentiation, survival, apoptosis and proliferation [5, 6]. Some are also postulated to be involved in disease etiology and could represent potential targets for new drugs [7, 8]. Virus-encoded IDPs facilitate multiple functions such as adaptation to new or dynamic host environments, modulating host gene expression to promote virus replication, or counteracting host-defense mechanisms [9–11]. IDPRs may be more tolerant of non-synonymous mutations than ordered protein regions [12], which may partly explain why virus genomes can tolerate high mutation rates [13, 14]. Viruses also have very compact genomes with overlapping reading frames [15, 16], in which mutations may potentially modify multiple proteins. This may confer viruses a greater capacity to acquire novel functions and interactions [17]. Overlapping regions tend to be more structurally disordered when compared to non-overlapping regions [18].

Several experimental techniques are available to detect IDPs and IDPRs. The most common methods identify either protein regions in crystal structures that have unresolvable coordinates (X-ray crystallography) or regions in nuclear magnetic resonance (NMR) structures that have divergent structural conformations [6, 19, 20]. Other experimental techniques include circular dichroism (CD) spectroscopy and limited proteolysis (LiP) [1]. The challenge, however, is that these methods are very labour-intensive and difficult to scale up to track the rapidly accumulating number of

unique protein sequences in public databases [6, 19]. At the time of this writing, over 60 million protein sequences have been deposited in the Uniprot database, yet only 0.02% of these sequences have been annotated for disorder [6]. As a result, numerous computational techniques that could potentially predict intrinsic disorder in protein sequences have been developed. These techniques work based on the assumptions that compared to IDPs and IDPRs, ordered proteins have a different amino acid composition as well as levels of sequence conservation [21, 22]. To date about 60 predictors for intrinsic disorder in proteins have been developed [1, 23, 24], which can be broadly classified into three major categories. The first category, the scoring function-based methods, predict protein disorder solely based on basic statistics of amino acid propensities, physio-chemical properties of amino acids and residue contacts in folded proteins to detect regions of high energy. A second category is characterized by the use of machine learning classifiers (*e.g.*, regularized regression models or neural networks) to predict protein disorder based on amino acid sequence properties. The third category are meta-predictors that predict disorder from an ensemble of predictive methods from the other two categories [1, 6, 25].

Different predictors of intrinsic disorder are developed on a variety of methodologies and will inevitably vary with respect to their sensitivities and biases in application to different protein sequences. As a result, it has been relatively difficult to benchmark these methods to identify a single disorder prediction method that can be classified as the most accurate relative to the others [24]. The DisProt database is a good resource for obtaining experimental data that has been manually curated for disorder in proteins, and can be used for benchmarking the performance of disorder predictors. As of April 27th, 2020, the Disprot protein database contained  $n = 3500$  proteins of which 126 were virus-encoded proteins that have been annotated for intrinsic disorder as a presence-absence characteristic at the amino acid level [26, 27]. Previously, Tokuriki *et al.* [14] reported preliminary evidence that when compared to non-viruses, viral proteins possess many distinct biophysical properties including having shorter disordered regions. We are not aware

of a published study that has previously benchmarked predictors of intrinsic disorder specifically for viral proteins. Here, we report results from a comparison of 21 disorder predictors on viral proteins from the DisProt database to firstly determine which methods work best for viruses, and secondly to generate inputs for an ensemble predictor that we evaluate alongside the predictors used individually.

# Methods

## Data collection

The Database of Protein Disorder (DisProt) [28] was used to collect virus protein sequences annotated with intrinsically disordered regions, based on experimental data derived from various detection methods; *e.g.*, X-ray crystallography, NMR spectroscopy, CD spectroscopy (both far and near UV) and protease sensitivity. DisProt records include the amino acid sequence and all disordered regions annotated with the respective detection methods as well as specific experimental conditions. At the time of our study, DisProt contained 3,500 author-verified proteins, of which all viral proteins were collected for the present study. A total of 126 virus proteins were obtained, derived from different detection methods. Similarly, a set of 126 non-viral proteins was sampled at random without replacement from the protein database for comparison.

We evaluated a number of disorder prediction programs and web applications. From the methods tested, we selected a subset of predictors favouring those that were developed more recently, are actively maintained, and performed well in previous method comparison studies [1, 29]. Where alternate settings or different versions based on training data were available for a given predictor, we tested all combinations. Our final set of 21 prediction methods tested were: SPOT-Disorder2 [30], PONDR-FIT [31], IUPred2 (short and long) [32], PONDR (VLXT, XL1-XT, CAN-XT, VL3-BA, and VSL2 variants) [33], Disprot (VL2 and variants VL2-V, -C and -S; VL3, VL3H, and VSLB) [34], CSpritz (short and long) [35], and ESpritz (variants trained on X-ray, NMR, and Disprot

data) [36]. Although several other predictor models have been released online, the respective web services were unavailable or broken over the course of our data collection.

To obtain disorder predictions from the methods that were only accessible as web applications, *i.e.*, with no source code or compiled binary standalone distribution, we wrote Python scripts to automate the process of submitting protein sequence inputs and parsing HTML outputs. We used Selenium in conjunction with ChromeDriver (v81.0.4044.69) [37] to automate the web browsing and form submission processes. For each predictor, we implemented a delay of 90 seconds between consecutive protein sequence queries to avoid overloading the web servers hosting the respective predictor algorithms with repeated requests. Due to issues with the DisProt webserver, we were only able to obtain predictions for the non-viral protein data set for 13 of the predictors.

We converted each DisProt record to a binary vector corresponding to ordered/disordered state of residues in the amino acid sequence. To compare results between disorder prediction algorithms, we dichotomized continuous-valued residue predictions, *i.e.*, intrinsic disorder probability, by locating the threshold that maximized the Matthews correlation coefficient (MCC) for each predictor applied to the DisProt training data. This optimal threshold was estimated using Brent's root-finding algorithm as implemented by the *optim* function in the R statistical computing environment (version 3.4.4). In addition, we calculated the accuracy, specificity and sensitivity for each predictor from the contingency table of DisProt residue labels and dichotomized predictions.

## **Ensemble classifier training and validation**

To assess whether the accuracy of existing predictors could be further improved on the virus-specific data set, we trained an ensemble classifier on the outputs of all predictors as features. Specifically, we used the random forest method implemented in the *scikit-learn* (version 0.23.1) Python module [38], which employs a set of de-correlated decision trees and averages their respective outputs to obtain an ensemble prediction [39]. To reduce bias, random forests fit the same

decision trees to many bootstrap samples of the training data, and each committee of trees ‘votes’ for a particular classification [40]. By splitting the trees based on different samples of features, random forests reduce the correlation between trees and the overall variance.

We split the viral protein data into random testing and training subsets, with 30% of protein sequences reserved for testing. Due to class imbalance in the data (*i.e.*, only a minority of residues are labeled as disordered), we used stratified random sampling using the ‘StratifiedShuffleSplit’ function in the *scikit-learn* module. This function stratifies the data by label so that a constant proportion of labels is maintained in the training subset. Continuous-valued outputs from each predictor were normalized to a zero mean and unit variance. Thus, we did not apply the dichotomizing thresholds to these features (predictor outputs) when training the random forest classifier.

We used 5-fold cross validation to tune the four hyper-parameters of the random forest classifier; namely: (1) the number of decision trees; (2) the maximum depth of any given decision tree; and the minimum number of samples required to split (3) an internal node or (4) a leaf node. To further minimize the effect of class imbalance in our data, we used over-sampling to balance the data with synthetic cases [41]. As suggested in [42], we applied an over-sampling procedure at every iteration of the cross-validation analysis to avoid over-optimistic results. We used the Python package *imbalanced-learn* [43] to over-sample the minority class (residues in intrinsically disordered regions) using the synthetic minority oversampling technique (SMOTE) [44]. SMOTE generates new cases by sampling the original data at random with replacement, evaluates each sample’s  $k$  nearest neighbours in the feature space, and then generates new synthetic samples along the vectors joining the sample to one of the neighbouring points. Over-sampling enables decision trees to be more generalizable by amplifying the decision region of the minority class.

Using the optimized tuning parameters, we fit the final model on all of the training data. We applied this final model to generate predictions on the reserved testing data and calculated the MCC,

sensitivity, specificity and accuracy. We repeated this process 10 times with randomly generated seeds to split the data into training and testing subsets, and averaged these performance metrics across replicates.

## **Comparison to non-viral data**

To characterize how the performance of individual disorder predictors might vary among proteins from viruses and non-viruses, we computed the root mean square error (RMSE) for all continuous-valued predictions relative to the Disprot label (0, 1). We visualized this error distribution using principal component analysis (PCA). As well, we trained a support vector machine (SVM) on the RMSE values to determine whether the virus/non-virus labels were separable in this space. We used the default radial basis kernel with the C-classification SVM method implemented in the R package *e1071* [45], with 100 training subsets sampled at random without replacement for half of the data, and the remaining half for validation.

## **Data availability**

We have released the Python scripts for automating queries to the disorder prediction web servers under a permissive free software license at <https://github.com/PoonLab/Floppy/>.

## **Results and Discussion**

### **Viral and non-viral proteins have similar levels of disorder**

We obtained 126 viral and 126 randomly selected non-viral protein sequences from the DisProt database. The sequences were already annotated manually by a panel of experts for the presence or absence of disorder at each amino acid position, based on experimental data [27]. Supplementary Tables S1 and S2 summarize the composition of the viral and non-viral protein datasets, respectively. The viral protein data set represents 22 virus families and 48 species. Not surpris-

ingly, human immunodeficiency virus type 1 was disproportionately represented in these data with 16 entries corresponding to seven different gene products. Similarly, the non-viral protein data set was predominated by 75 human proteins, followed by 23 proteins from the yeast *Saccharomyces cerevisiae*. We found no significant difference in amino acid sequence lengths between viruses and all other organisms (Wilcoxon rank sum test,  $P = 0.60$ ), with median lengths of 355 [interquartile range, IQR: 145–846] and 395 [203–729] amino acids, respectively. Furthermore, the dispersion in sequence lengths was significantly greater among viral proteins relative to the nonviral proteins (Ansari-Bradley test,  $P = 0.0028$ ). There was no significant difference in the proportion of residues in disordered regions between the viral and non-viral data (Wilcoxon  $P = 0.97$ ). The mean proportions were 0.30 (interquartile range, IQR [0.07-0.42]) for viral and 0.30 [0.07-0.47] for non-viral proteins, and similar numbers of proteins exhibited complete disorder (13 and 9, respectively).

### **Divergent predictions of disorder in viral proteins**

Our first objective was to benchmark the performance of different predictors of intrinsic protein disorder to determine which predictor conferred the highest accuracy for viral proteins. These predictors generate continuous-valued outputs that generally correspond to the estimated probability that the residue is in an intrinsically disordered region. To create a uniform standard for comparison to the binary presence-absence labels, we optimized the disorder prediction thresholds as a tuning parameter for each predictor for the viral and non-viral datasets, respectively (Supplementary Tables S3 and S4). Put simply, residues with values above the threshold were classified as disordered. We used both the Matthews correlation coefficient (MCC, ranging from  $-1$  to  $+1$  [46]) and area under the receiver-operator characteristic curve (AUC, ranging from 0 to 1) to quantify the performance of each predictor.

These quantities were significantly correlated (Spearman's  $\rho = 0.95$ ,  $P = 5.2 \times 10^{-6}$ ) and identified ESpritz.Disprot, CSpritz.Long and SPOT.Disorder2 as the most effective predictors for the



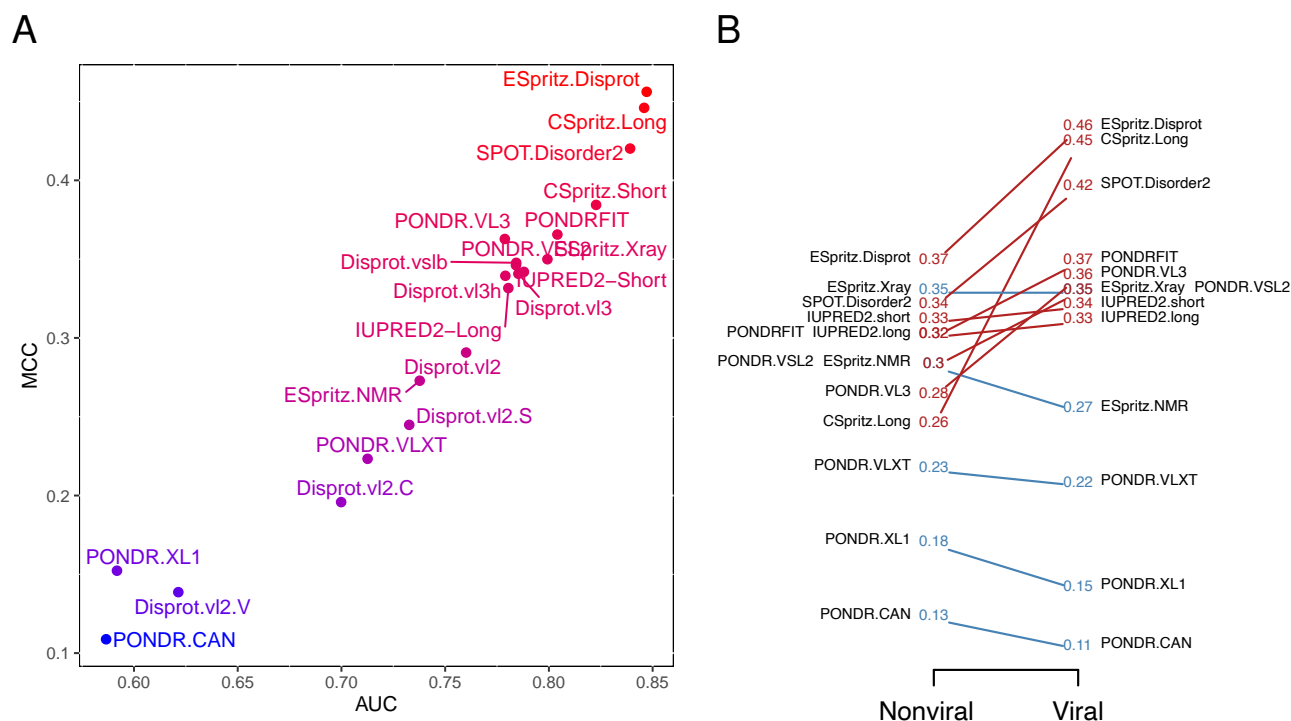

Figure 1: Performance of predictors on viral data set. (A) Scatterplot of MCC and AUC values for 21 predictors applied to the viral protein data set. (B) Slopegraph comparing the MCC values for 13 predictors applied to both non-viral and viral data sets. Because the three variants of the ESpritz model obtained identical MCC values, the corresponding labels were merged. Two labels (PONDRFIT, PONDR.VSL2) were displaced to prevent overlaps on the left and right sides, respectively.

viral proteins (Figure 1A). ESpritz.Disprot obtained the highest overall values for both MCC and AUC (0.46 and 0.85, respectively). We note that SPOT.Disorder2 has recently been reported to exhibit a high degree of prediction accuracy for proteins of varying length [47]. In contrast, the predictors Disprot-VL2-V, PONDR-XL1 and PONDR-CAN performed very poorly on the viral dataset with  $MCC < 0.2$  and  $AUC < 0.65$ . VL2-V is a ‘flavour’ of the VL2 predictors which were allowed to specialize on different subsets of a partitioned training set; for example, V tended to call higher levels of disorder in proteins of Archaeobacteria [34]. Similarly, PONDR-XL1 was optimized to predict longer disordered regions and PONDR-CAN was trained specifically on cal-cineurins (a protein phosphatase) that is known to perform poorly on other proteins [48].

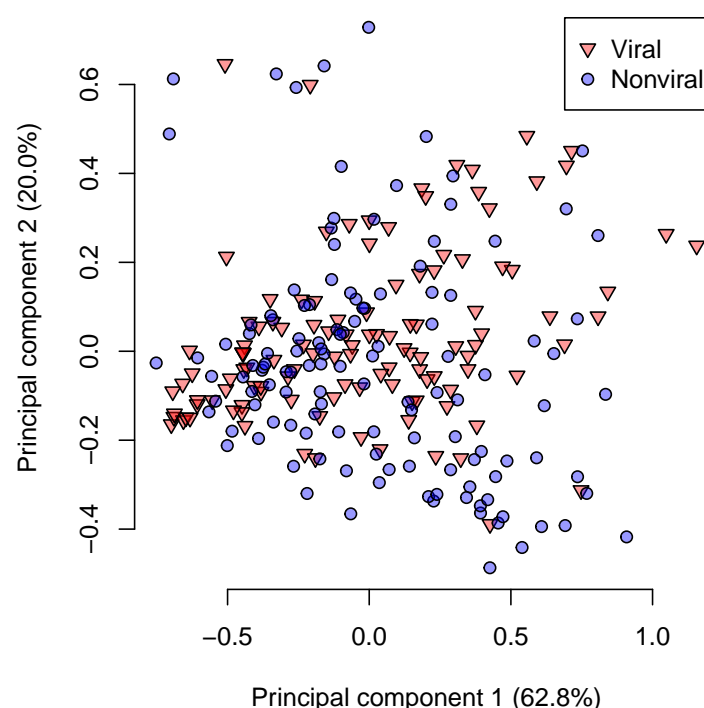

Figure 2: Principal components analysis plot of the root mean squared errors (RMSEs) for 13 disorder predictors on viral (red, triangles) and non-viral (blue, circles) protein sequences. The percentages of total variance explained by the first two principal components are indicated in parentheses in the respective axis labels.

Figure 1B compares the MCC values for non-viral and viral protein data sets. Predictors exhibited substantially less variation in MCC for the non-viral data — put another way, the majority of predictors were more accurate at predicting disorder in viral proteins. The entire set of MCC, AUC, sensitivity and specificity values for both data sets are summarized in Supplementary Tables S3 and S4. To examine potential differences among predictors in greater detail, we calculated the RMSE for each protein and predictor and used a principal components analysis to visualize the resulting matrix (Figure 2). The PCA indicated that the different predictors did not exhibit markedly divergent error profiles at the level of entire proteins. However, a support vector machine classifier trained on a random half of these data obtained, on average, an AUC of 0.75 ( $n = 100$ , range = 0.65 – 0.83), indicating that the viral and non-viral protein labels were appreciably separable

with respect to these RMSE values.

## Ensemble prediction

Ensemble classifiers are expected to perform better than their constituent models because they can reduce overfitting of the data by the latter [49]. Although multiple predictive models of protein disorder employ an ensemble approach, none of them has been trained specifically on viral protein data. We trained a random forest classifier on the outputs of the predictors used in our study using 10 random training subsets of the viral protein data. Next, we validated the performance of this ensemble model in comparison to these individual predictors to determine if training on viral data conferred a significant advantage. We found that the ensemble classifier performed substantially better, with a mean MCC of 0.72 (range 0.62 – 0.86). This corresponded to a roughly 27% improvement relative to ESpritz.Disorder, the best performing disorder predictor on these data (Figure 1).

To examine the relative contribution of the different predictors used as inputs for the ensemble method, we evaluated the feature importance of each input (Figure 3) — roughly the prevalence of that feature among the decision trees comprising the random forest. We observed that the individual accuracy of a predictor did not necessarily correspond to its feature importance. Specifically, the best predictors (ESpritz.Disprot, CSpritz.Long and SPOT-Disorder.2) tended to be assigned higher importance values. On the other hand, both Disprot-VL2.C and Disprot-VL2.V also displayed high importance despite having some of the worst accuracy measures when evaluated individually (Figure 1).

## Example: SARS-CoV-2 accessory protein 6

To illustrate the use of our ensemble model on a novel protein, we applied this model and the 21 individual predictors to the accessory protein encoded by ORF6 in the novel 2019 coronavirus that was first isolated in Wuhan, China (designated SARS-CoV-2). ORF6 is one of the eight accessory

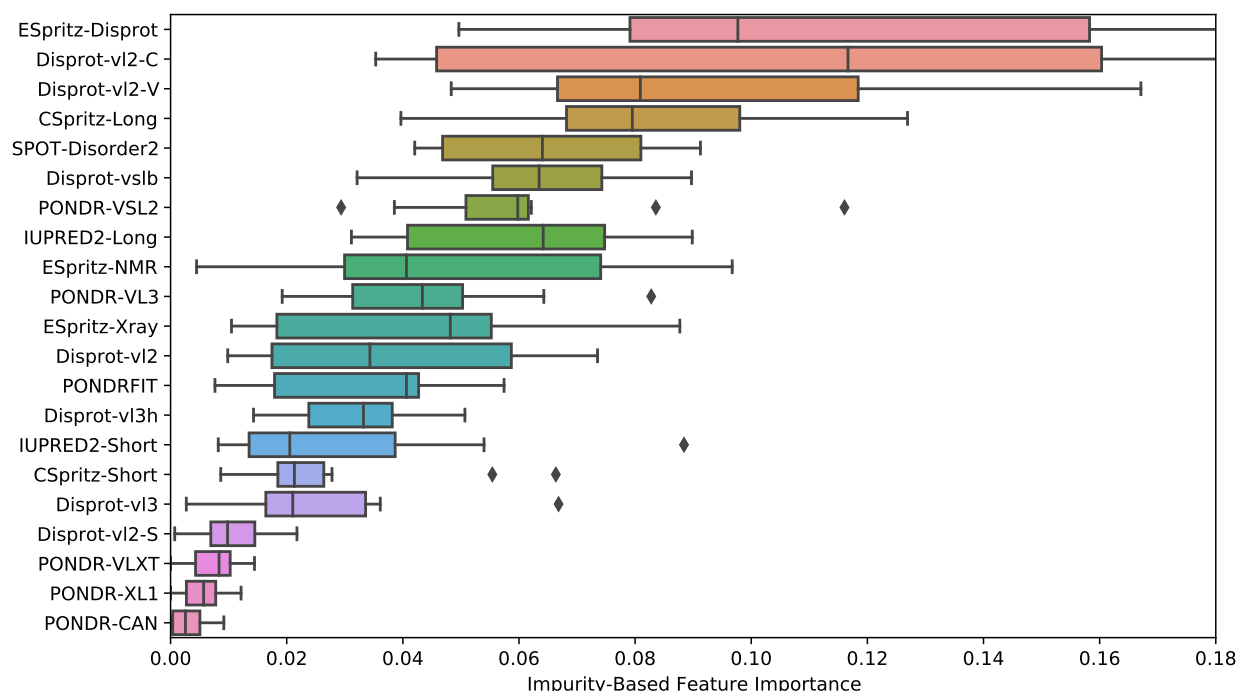

Figure 3: Box plot of the average decrease in Gini impurity by each feature in the random forest, for 10 random runs of the random forest model. Vertical line indicates the median, the box is the interquartile range (IQR; range from first to third quartiles). The left whisker extends to the first datum greater than  $Q1 - 1.5 \times IQR$  and the right whisker extends to the last datum smaller than  $Q3 + 1.5 \times IQR$ . Individual points are outliers that lie outside this range.

genes of this virus. Its protein product is involved in antagonizing interferon activity thereby suppressing host immune response [50]. The protein is predicted to be highly disordered, particularly in its C-terminal region that contains short linear motifs involved in numerous biological activities [51]. We used a heatmap (Figure 4) to visually summarize results from the ensemble method and individual predictors, mapped to the ORF6 amino acid sequence. Overall, most predictors assigned a higher probability of disorder in the C-terminal region of the protein, with the conspicuous exception of PONDR-XL1 and PONDR-CAN, which did not predict any disordered residues in this region. We also observed considerable variation among predictors around this overall trend. Although the PONDR-XL1 predictor is documented to omit the first and last 15 residues from disorder predictions, we observed that only 14 residues were reported this way — this treatment was

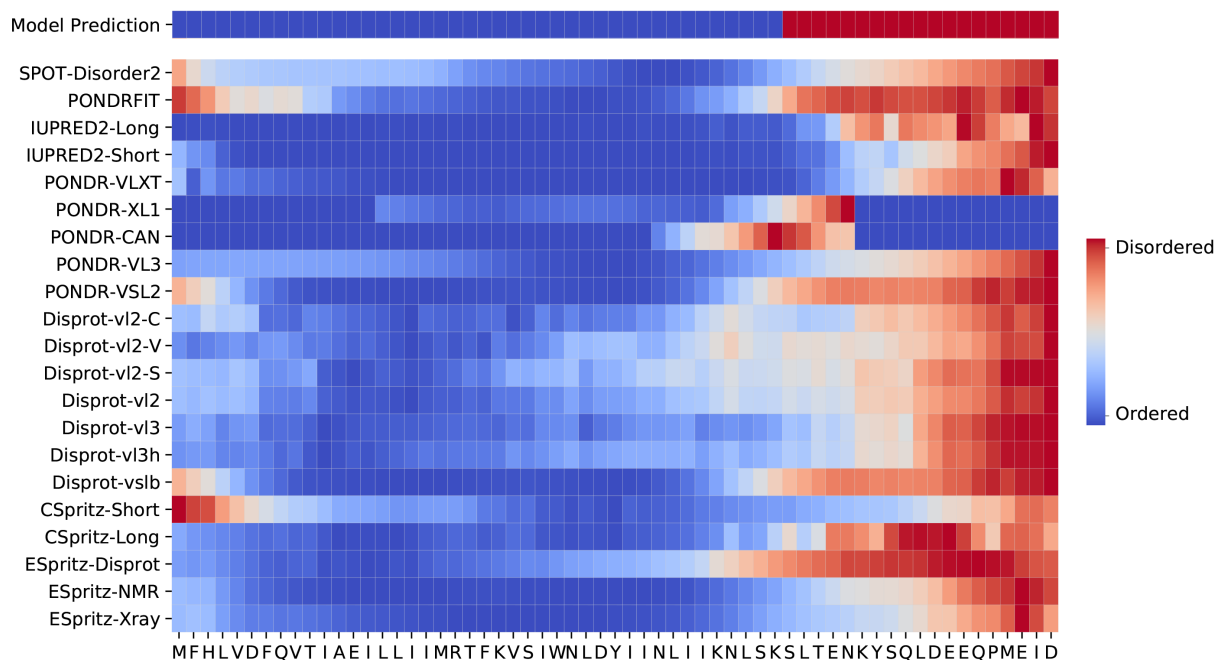

Figure 4: Disorder Predictions for novel ORF6 in SARS-CoV-2. The first row represents the random forest model predictions, with subsequent rows corresponding to individual predictors. The entire protein length is represented on the x-axis, each grid is an amino acid. Red squares indicate disordered predictions and blue squares indicate ordered predictions.

also obtained for PONDR-CAN, although it was not a documented behaviour of that predictor.

## Concluding remarks

Intrinsically disordered protein regions play an essential role in many viral functions [11]. It is therefore important to predict these regions accurately in order to make biological inferences from sequence variation. In this study, we found that predictive models of intrinsic disorder were more divergent in performance when evaluated on viral proteins than non-viral proteins. We note that many of these predictors could only be accessed through web applications, and some services become unavailable at different points of our study. Although we obtained more accurate predictions — or at least, predictions that were more concordant with an expert-curated database of intrinsic protein disorder [27] — using an ensemble ‘machine learning’ method, the erratic availability of

the constituent predictors presents a significant obstacle to the practical utility of such approaches. Hence, we encourage researchers in the field of disorder prediction to support open science by releasing their source code or compiled binaries for local execution.

## **Acknowledgments**

This work was supported in part by grants from the Natural Sciences and Engineering Research Council of Canada (NSERC, RGPIN-2018-05516) and from the Canadian Institutes of Health Research (CIHR, PJT-155990).

## Supplementary Tables

Table S1: Summary of viral protein data

| Family                | Organism                              | Protein                                       | Disprot ID | Length |
|-----------------------|---------------------------------------|-----------------------------------------------|------------|--------|
| Alphafusellovirus     | Sulfolobus spindle-shape virus 1      | Protein F-112                                 | DP00847    | 112    |
| Alphatectivirus       | Enterobacteria phage PRD1             | Protein P16                                   | DP01012    | 117    |
| Betapolyomavirus      | JC polyomavirus<br>Simian virus 40    | Agnoprotein                                   | DP01186    | 71     |
|                       |                                       | Large T antigen                               | DP01618    | 708    |
|                       |                                       | Major capsid protein VP1                      | DP00182    | 362    |
| Chordopoxvirinae      | Molluscum contagiosum virus subtype 1 | Viral CASP8 and FADD-like apoptosis regulator | DP02042    | 241    |
|                       |                                       |                                               |            |        |
|                       | Myxoma virus                          | M156R                                         | DP00849    | 102    |
|                       |                                       | Probable host range protein 2-3               | DP01983    | 203    |
|                       |                                       |                                               |            |        |
|                       | Vaccinia virus                        | Protein F1                                    | DP01539    | 222    |
|                       |                                       | Protein K7                                    | DP02194    | 149    |
|                       |                                       |                                               |            |        |
| Deltavirus            | Hepatitis delta virus genotype I      | Small delta antigen                           | DP00965    | 195    |
| Firstpapillomavirinae | Human papillomavirus type 16          | Protein E6                                    | DP01615    | 158    |
|                       |                                       |                                               |            |        |
|                       |                                       |                                               |            |        |
|                       | Human papillomavirus type 45          | Protein E7                                    | DP00024    | 98     |
|                       |                                       | Regulatory protein E2                         | DP01428    | 365    |
|                       |                                       | Protein E7                                    | DP01780    | 106    |
|                       | Human papillomavirus type 51          | Protein E7                                    | DP00947    | 106    |
|                       |                                       | Protein E6                                    | DP02256    | 151    |
| Flaviviridae          | Bovine viral diarrhea virus           | Genome polyprotein                            | DP00675    | 3988   |
|                       |                                       |                                               |            |        |
|                       |                                       |                                               |            |        |
|                       | Dengue virus type 1                   | Genome polyprotein                            | DP01929    | 3392   |
|                       |                                       |                                               |            |        |
|                       |                                       |                                               |            |        |
|                       | Dengue virus type 2                   | Genome polyprotein                            | DP01930    | 3391   |
|                       |                                       |                                               | DP01245    | 3388   |
|                       |                                       |                                               | DP00876    | 3391   |
|                       | Dengue virus type 3                   | Genome polyprotein                            | DP02204    | 3390   |
|                       |                                       |                                               |            |        |
|                       |                                       |                                               |            |        |
|                       | Dengue virus type 4                   | Genome polyprotein                            | DP01931    | 3387   |
|                       |                                       |                                               |            |        |
|                       |                                       |                                               |            |        |
|                       | Hepatitis C virus genotype 1a         | Genome polyprotein                            | DP00588    | 3011   |
|                       |                                       |                                               |            |        |
|                       |                                       |                                               |            |        |
|                       | Hepatitis C virus genotype 1b         | Genome polyprotein                            | DP01142    | 3010   |
|                       |                                       |                                               |            |        |
|                       |                                       |                                               |            |        |

Table S1: Summary of viral protein data

| Family         | Organism                         | Protein                                                     | Disprot ID | Length |
|----------------|----------------------------------|-------------------------------------------------------------|------------|--------|
| Flaviviridae   | Hepatitis C virus genotype 1b    | Genome polyprotein                                          | DP00615    | 3010   |
|                | Hepatitis C virus genotype 2a    | Genome polyprotein                                          | DP01031    | 3033   |
|                | Hepatitis GB virus B             | Genome polyprotein                                          | DP00674    | 2864   |
|                | Kunjin virus                     | Genome polyprotein                                          | DP02051    | 3433   |
|                | Murray valley encephalitis virus | Genome polyprotein                                          | DP02212    | 3434   |
|                | West Nile virus                  | Genome polyprotein                                          | DP02203    | 3433   |
|                |                                  |                                                             | DP00673    | 3430   |
| Herpesviridae  | Zika virus                       | Genome polyprotein                                          | DP01256    | 3419   |
|                | Epstein-Barr virus               | Latent membrane protein 2A                                  | DP01060    | 118    |
|                | Human herpesvirus 1              | Envelope glycoprotein B                                     | DP02128    | 904    |
|                |                                  | Major viral transcription factor ICP4                       | DP01305    | 1298   |
|                |                                  | TAP transporter inhibitor ICP47                             | DP02208    | 88     |
|                |                                  | Tegument protein VP16                                       | DP02291    | 490    |
|                |                                  |                                                             | DP01642    | 490    |
|                |                                  | Thymidine kinase                                            | DP00419    | 376    |
|                | Human herpesvirus 2              | Tegument protein VP16                                       | DP00087    | 490    |
|                | Human herpesvirus 8              | Kaposi's sarcoma-associated herpes-like virus ORF73 homolog | DP02334    | 1162   |
|                | Human herpesvirus 8              | LANA                                                        | DP01621    | 1117   |
|                | Human herpesvirus 8 type P       | Viral macrophage inflammatory protein 2                     | DP00685    | 94     |
| Inovirus       | Enterobacteria phage fd          | Attachment protein G3P                                      | DP00034    | 424    |
| Mastadenovirus | Human adenovirus A serotype 12   | Early E1A protein                                           | DP01151    | 266    |
|                | Human adenovirus C serotype 2    | Early E1A protein                                           | DP01928    | 289    |
|                | Human adenovirus C serotype 5    | DNA-binding protein                                         | DP00003    | 529    |
|                |                                  | Early E1A protein                                           | DP01150    | 289    |
|                |                                  | Pre-protein VI                                              | DP00808    | 250    |
| Mimivirus      | Acanthamoeba polyphaga mimivirus | Probable uracil-DNA glycosylase                             | DP01481    | 370    |



Table S1: Summary of viral protein data

| Family          | Organism                            | Protein                                     | Disprot ID | Length |
|-----------------|-------------------------------------|---------------------------------------------|------------|--------|
| Mimivirus       | Acanthamoeba                        | Tyrosine-tRNA ligase                        | DP00726    | 346    |
|                 | polyphaga mimivirus                 |                                             |            |        |
| Myoviridae      | Enterobacteria phage T4             | Baseplate central spike complex protein gp5 | DP00284    | 575    |
|                 |                                     | Deoxycytidylate deaminase                   | DP00583    | 193    |
|                 |                                     | Fibritin                                    | DP01616    | 487    |
|                 |                                     | RNA polymerase-associated protein Gp33      | DP00898    | 112    |
|                 | Escherichia phage P1                | Antitoxin phd                               | DP00288    | 73     |
|                 |                                     | Recombination enhancement function protein  | DP00932    | 186    |
| Myoviridae      | Escherichia phage P2                | Integrase                                   | DP00850    | 337    |
| Negarnaviricota | Hendra virus                        | Nucleoprotein                               | DP00698    | 532    |
|                 |                                     | Phosphoprotein                              | DP00700    | 707    |
|                 | Human respiratory syncytial virus A | Phosphoprotein                              | DP00447    | 241    |
|                 |                                     |                                             | DP00895    | 241    |
|                 | Influenza A virus                   | Hemagglutinin                               | DP00566    | 566    |
|                 |                                     | Matrix protein 2                            | DP01016    | 96     |
|                 |                                     | Nuclear export protein                      | DP00871    | 121    |
|                 | Influenza B virus                   | Nucleoprotein                               | DP01405    | 560    |
|                 | Lassa virus                         | RING finger protein Z                       | DP00820    | 99     |
|                 | Measles virus                       | Nucleoprotein                               | DP00160    | 523    |
|                 |                                     |                                             | DP00640    | 525    |
|                 |                                     | Phosphoprotein                              | DP00133    | 507    |
|                 | Nipah virus                         | Glycoprotein G                              | DP00686    | 602    |
|                 |                                     | Nucleoprotein                               | DP00697    | 532    |
|                 |                                     | Phosphoprotein                              | DP00699    | 709    |
|                 | Rabies virus                        | Phosphoprotein                              | DP01759    | 297    |
|                 | Sendai virus                        | Nucleoprotein                               | DP00629    | 524    |
|                 |                                     | Phosphoprotein                              | DP00939    | 568    |
|                 | Vesicular stomatitis Indiana virus  | Phosphoprotein                              | DP01395    | 265    |
|                 |                                     |                                             | DP01394    | 265    |
|                 |                                     |                                             | DP01393    | 265    |
|                 |                                     |                                             | DP01391    | 265    |
|                 | Zaire ebolavirus                    | Hexameric zinc-finger protein VP30          | DP00627    | 288    |
|                 |                                     | Polymerase cofactor VP35                    | DP00998    | 340    |

Table S1: Summary of viral protein data

| Family            | Organism                         | Protein                             | Disprot ID | Length |
|-------------------|----------------------------------|-------------------------------------|------------|--------|
| Nidovirales       | Human SARS coron-avirus          | Nucleoprotein                       | DP00948    | 422    |
| Orthohepadnavirus | Hepatitis B virus                | Large envelope protein              | DP01806    | 445    |
| Parvovirinae      | Adeno-associated virus           | Capsid protein VP1                  | DP01984    | 733    |
| Picornavirales    | Enterovirus D68                  | VP4                                 | DP00986    | 69     |
|                   | Foot-and-mouth disease virus     | Genome polyprotein                  | DP00573    | 2332   |
|                   | Mengo encephalomyocarditis virus | Genome polyprotein                  | DP01129    | 2293   |
| Podoviridae       | Bacillus phage phi29             | Capsid assembly scaffolding protein | DP02261    | 98     |
|                   | Salmonella phage P22             | Transcriptional repressor arc       | DP01512    | 53     |
| Potyviridae       | Potato virus Y                   | Polyprotein                         | DP01039    | 594    |
| Reoviridae        | Reptilian orthoreovirus          | Membrane fusion protein p14         | DP01043    | 125    |
| Retroviridae      | Equine infectious anemia virus   | Protein Tat                         | DP00764    | 78     |
|                   | HIV-1                            | Protein Nef                         | DP00919    | 208    |
|                   | HIV-1                            | Protein Tat                         | DP01295    | 72     |
|                   | HIV-1                            | Protein Tat                         | DP01087    | 101    |
|                   | HIV-1 subtype B                  | Envelope glycoprotein gp160         | DP00976    | 856    |
|                   |                                  | Envelope glycoprotein gp160         | DP00978    | 843    |
|                   |                                  | Gag-Pol polyprotein                 | DP00410    | 1435   |
|                   |                                  | Gag polyprotein                     | DP00101    | 500    |
|                   |                                  | Gag polyprotein                     | DP00148    | 512    |
|                   |                                  | Protein Nef                         | DP01843    | 206    |
|                   |                                  | Protein Nef                         | DP00048    | 206    |
|                   |                                  | Protein Nef                         | DP00189    | 206    |
|                   |                                  | Protein Rev                         | DP00424    | 116    |
|                   |                                  | Protein Tat                         | DP00929    | 86     |
|                   |                                  | Protein Vif                         | DP00875    | 192    |
|                   | HIV-1 subtype C                  | Protein Tat                         | DP01003    | 101    |
|                   | HIV-1 subtype D                  | Protein Tat                         | DP00842    | 86     |
|                   | Mason-Pfizer monkey virus        | Gag polyprotein                     | DP01625    | 657    |
|                   | Moloney murine leukemia virus    | Gag-Pol polyprotein                 | DP00651    | 1738   |

Table S1: Summary of viral protein data

| Family        | Organism                      | Protein                         | Disprot ID | Length |
|---------------|-------------------------------|---------------------------------|------------|--------|
| Siphoviridae  | Bacillus phage SPP1           | 39 protein                      | DP00750    | 126    |
|               | Escherichia phage HK022       | Excisionase                     | DP01013    | 72     |
|               | Escherichia phage lambda      | Antitermination protein N       | DP00005    | 107    |
|               |                               | DNA-packaging protein FI        | DP01336    | 132    |
|               |                               | Head-tail connector protein FII | DP01762    | 117    |
|               |                               | Regulatory protein cro          | DP00741    | 66     |
|               |                               | Capsid protein                  | DP00064    | 279    |
| Solemoviridae | Southern cowpea mosaic virus  |                                 |            |        |
| Togaviridae   | Chikungunya virus             | Nonstructural polyprotein       | DP01469    | 2474   |
|               |                               |                                 | DP01468    | 2474   |
|               |                               |                                 | DP01466    | 2474   |
|               |                               |                                 | DP01188    | 2474   |
|               | Semliki forest virus          | Structural polyprotein          | DP00999    | 1253   |
|               | Sindbis virus subtype Ockelbo | Structural polyprotein          | DP00066    | 1245   |
| Tombusviridae | Carnation mottle virus        | Capsid protein                  | DP02071    | 348    |
| Tymovirales   | Pepino mosaic virus           | Coat protein                    | DP01059    | 237    |

Table S2: Summary of non-viral protein data

| Family   | Organism     | Protein                                             | Disprot ID | Length |
|----------|--------------|-----------------------------------------------------|------------|--------|
| Chordata | Homo sapiens | 60S acidic ribosomal protein P2                     | DP00793    | 115    |
|          |              | 60S ribosomal protein L4                            | DP01654    | 427    |
|          |              | Amyloid-beta precursor protein                      | DP01280    | 770    |
|          |              | Anaphase-promoting complex subunit 15               | DP01454    | 121    |
|          |              | Androgen receptor                                   | DP00492    | 920    |
|          |              | Antigen peptide transporter 2                       | DP02210    | 686    |
|          |              | Apoptosis-stimulating of p53 protein 2              | DP01164    | 1128   |
|          |              | ATM interactor                                      | DP01288    | 823    |
|          |              | ATP-dependent RNA helicase DDX19B                   | DP01560    | 479    |
|          |              | Axin-1                                              | DP00959    | 862    |
|          |              | Beta-adducin                                        | DP00241    | 726    |
|          |              | Brain acid soluble protein 1                        | DP00930    | 227    |
|          |              | Breast cancer type 2 susceptibility protein         | DP01869    | 3418   |
|          |              | Calmodulin regulator protein PCP4                   | DP00592    | 62     |
|          |              | cAMP-dependent protein kinase inhibitor alpha       | DP00934    | 76     |
|          |              | C-C motif chemokine 26                              | DP00696    | 94     |
|          |              | Cellular tumor antigen p53                          | DP00086    | 393    |
|          |              | Cyclin-T1                                           | DP01462    | 726    |
|          |              | Cysteine protease ATG4B                             | DP01326    | 393    |
|          |              | Cystic fibrosis transmembrane conductance regulator | DP00012    | 1480   |
|          |              | Cytoplasmic protein NCK1                            | DP01114    | 377    |
|          |              | DnaJ homolog subfamily C member 24                  | DP00865    | 149    |
|          |              | DNA repair protein XRCC4                            | DP00152    | 336    |
|          |              | E3 ubiquitin-protein ligase PPP1R11                 | DP00219    | 126    |

Table S2: Summary of non-viral protein data

| Family   | Organism     | Protein                                                                          | Disprot ID | Length |
|----------|--------------|----------------------------------------------------------------------------------|------------|--------|
| Chordata | Homo sapiens | E3 ubiquitin-protein ligase XIAP                                                 | DP01773    | 497    |
|          |              | Epidermal growth factor receptor                                                 | DP00309    | 1210   |
|          |              | ETS domain-containing protein Elk-4                                              | DP01329    | 431    |
|          |              | Eukaryotic initiation factor 4A-III                                              | DP02069    | 411    |
|          |              | Eukaryotic translation initiation factor 1A, X-chromosomal                       | DP00903    | 144    |
|          |              | F-box only protein 4                                                             | DP01884    | 387    |
|          |              | Filamin-binding LIM protein 1                                                    | DP01310    | 373    |
|          |              | Geminin                                                                          | DP00901    | 209    |
|          |              | Glycosylphosphatidylinositol anchored high density lipoprotein-binding protein 1 | DP01327    | 184    |
|          |              | Heterogeneous nuclear ribonucleoprotein F                                        | DP01736    | 415    |
|          |              | Heterogeneous nuclear ribonucleoproteins A2/B1                                   | DP01109    | 353    |
|          |              | Homeobox protein Nkx-3.1                                                         | DP00683    | 234    |
|          |              | Hypoxia-inducible factor 1-alpha                                                 | DP00262    | 826    |
|          |              | Immunoglobulin alpha Fc receptor                                                 | DP00311    | 287    |
|          |              | Integrin beta-2                                                                  | DP01848    | 769    |
|          |              | Isoform 11 of E3 ubiquitin-protein ligase Mdm2                                   | DP01133    | 497    |
|          |              | Isoform 2 of Protein max                                                         | DP01097    | 151    |
|          |              | Kinetochore protein NDC80 homolog                                                | DP01576    | 642    |
|          |              | Kinetochore scaffold 1                                                           | DP01269    | 2342   |
|          |              | Mast/stem cell growth factor receptor Kit                                        | DP02247    | 976    |
|          |              | M-phase inducer phosphatase 3                                                    | DP02126    | 473    |

Table S2: Summary of non-viral protein data

| Family   | Organism     | Protein                                          | Disprot ID | Length |
|----------|--------------|--------------------------------------------------|------------|--------|
| Chordata | Homo sapiens | Natriuretic peptides B                           | DP00551    | 134    |
|          |              | Neurogenic locus notch homolog protein 1         | DP01104    | 2555   |
|          |              | Nuclear inhibitor of protein phosphatase 1       | DP00937    | 351    |
|          |              | Nuclear pore complex protein Nup133              | DP02164    | 1156   |
|          |              | Nuclear pore complex protein Nup153              | DP01799    | 1475   |
|          |              | Nuclear receptor coactivator 2                   | DP01880    | 1464   |
|          |              | Nuclear receptor coactivator 3                   | DP00343    | 1424   |
|          |              | Nucleophosmin                                    | DP01474    | 294    |
|          |              | P antigen family member 5                        | DP01473    | 130    |
|          |              | Peroxisome proliferator-activated receptor gamma | DP00718    | 505    |
|          |              | Polyglutamine-binding protein 1                  | DP01308    | 265    |
|          |              | Protein jagged-1                                 | DP00418    | 1218   |
|          |              | Protein max                                      | DP00084    | 160    |
|          |              | Protein regulator of cytokinesis 1               | DP02316    | 620    |
|          |              | Protein SMG7                                     | DP01844    | 1137   |
|          |              | Prothymosin alpha                                | DP01677    | 111    |
|          |              | Proto-oncogene c-Fos                             | DP00078    | 380    |
|          |              | Ras-related protein Rap-2a                       | DP00167    | 183    |
|          |              | Replication protein A 32 kDa subunit             | DP01361    | 270    |
|          |              | Serine/threonine-protein kinase PAK 4            | DP01184    | 591    |
|          |              | Signal recognition particle 19 kDa protein       | DP00570    | 144    |
|          |              | SOSS complex subunit C                           | DP01943    | 104    |
|          |              | Stonin-2                                         | DP01368    | 905    |
|          |              | T-cell surface glycoprotein CD3 gamma chain      | DP00508    | 182    |
|          |              | Thymidylate synthase                             | DP00073    | 313    |
|          |              | TP53-regulated inhibitor of apoptosis 1          | DP01835    | 76     |

Table S2: Summary of non-viral protein data

| Family   | Organism          | Protein                                                   | Disprot ID | Length |
|----------|-------------------|-----------------------------------------------------------|------------|--------|
| Chordata | Homo sapiens      | Transcription elongation regulator 1                      | DP01893    | 1098   |
|          |                   | Transcription initiation factor TFIID subunit 6           | DP01262    | 677    |
|          |                   | Tyrosine-protein kinase Lck                               | DP01580    | 509    |
|          |                   | Ubiquitin carboxyl-terminal hydrolase 7                   | DP00941    | 1102   |
|          | Mus musculus      | Amelogenin, X isoform                                     | DP01477    | 210    |
|          |                   | BH3-interacting domain death agonist                      | DP01661    | 195    |
|          |                   | Dehydrodolichyl diphosphate synthase complex subunit Nus1 | DP01304    | 297    |
|          |                   | Dystroglycan                                              | DP00491    | 893    |
|          |                   | Fermitin family homolog 1                                 | DP00655    | 677    |
|          |                   | Mediator of RNA polymerase II transcription subunit 1     | DP02151    | 1575   |
|          |                   | Phorbol-12-myristate-13-acetate-induced protein 1         | DP01281    | 103    |
|          |                   | Protein BEX1                                              | DP01183    | 128    |
|          |                   | Protein kinase C alpha type                               | DP01105    | 672    |
|          |                   | Transcription regulator protein BACH2                     | DP01009    | 839    |
|          |                   | Tumor suppressor ARF                                      | DP00335    | 169    |
|          | Rattus norvegicus | Calcium/calmodulin-dependent protein kinase type 1        | DP01958    | 374    |
|          |                   | Calpain-2 catalytic subunit                               | DP01996    | 700    |
|          |                   | Calpastatin                                               | DP01994    | 713    |
|          |                   | Cyclic AMP-responsive element-binding protein 1           | DP00080    | 341    |
|          |                   | Neuroendocrine protein 7B2                                | DP01557    | 210    |
|          |                   | Olfactory marker protein                                  | DP00279    | 163    |
|          |                   | Rab proteins geranylgeranyltransferase component A 1      | DP00458    | 650    |

Table S2: Summary of non-viral protein data

| Family   | Organism                 | Protein                                                                    | Disprot ID | Length |
|----------|--------------------------|----------------------------------------------------------------------------|------------|--------|
| Chordata | Rattus norvegicus        | Seminal vesicle secretory protein 4                                        | DP00527    | 112    |
|          |                          | Synaptosomal-associated protein 25                                         | DP00068    | 206    |
|          |                          | Vesicle-associated membrane protein 2                                      | DP00622    | 116    |
| Dikarya  | Millerozyma farinosa     | Salt-mediated killer protoxin 1                                            | DP00180    | 222    |
|          | Saccharomyces cerevisiae | Acetyl-CoA carboxylase                                                     | DP00557    | 2233   |
|          |                          | Autophagy-related protein 13                                               | DP01732    | 738    |
|          |                          | Cold sensitive U2 snRNA suppressor 1                                       | DP01978    | 436    |
|          |                          | DNA-directed RNA polymerases I, II, and III subunit RPABC2                 | DP00771    | 155    |
|          |                          | DNA topoisomerase 2                                                        | DP00076    | 1428   |
|          |                          | Dolichyl-diphosphooligosaccharide-protein glycosyltransferase subunit STT3 | DP01195    | 718    |
|          |                          | Eukaryotic initiation factor 4F subunit p150                               | DP00082    | 952    |
|          |                          | H/ACA ribonucleoprotein complex subunit CBF5                               | DP02055    | 483    |
|          |                          | Histone H2A.Z-specific chaperone CHZ1                                      | DP01135    | 153    |
|          |                          | Mitochondrial distribution and morphology protein 35                       | DP02325    | 86     |
|          |                          | Pre-mRNA-splicing factor 18                                                | DP02073    | 251    |
|          |                          | Protein SAN1                                                               | DP01136    | 610    |
|          |                          | Protein STE50                                                              | DP01515    | 346    |
|          |                          | Regulatory protein ADR1                                                    | DP00077    | 1323   |
|          |                          | Ribosome biogenesis protein ERB1                                           | DP00900    | 807    |
|          |                          | Ribosome biogenesis protein NSA1                                           | DP02195    | 463    |



Table S2: Summary of non-viral protein data

| Family       | Organism                 | Protein                                                 | Disprot ID                         | Length  |
|--------------|--------------------------|---------------------------------------------------------|------------------------------------|---------|
| Dikarya      | Saccharomyces cerevisiae | Securin                                                 | DP00256                            | 373     |
|              |                          | Suppressor protein STM1                                 | DP00994                            | 273     |
|              |                          | U6 snRNA-associated Sm-like protein LSm7                | DP01261                            | 115     |
|              |                          | Ubiquitin-conjugating enzyme E2 1                       | DP02193                            | 215     |
|              |                          | Ubiquitin-like modifier-activating enzyme ATG7          | DP02249                            | 630     |
|              |                          | UV excision repair protein RAD23                        | DP01629                            | 398     |
|              |                          | Vacuolar-sorting protein SNF8                           | DP01604                            | 233     |
|              |                          | Schizosaccharomyces pombe                               | YTH domain-containing protein mmi1 | DP01975 |
| Ecdysozoa    | Caenorhabditis elegans   | ATP-dependent RNA helicase laf-1                        | DP01113                            | 708     |
|              | Drosophila melanogaster  | Chromatin accessibility complex 16kD protein, isoform A | DP00811                            | 140     |
|              |                          | FACT complex subunit Ssrp1                              | DP00720                            | 723     |
|              |                          | Transcription initiation factor TFIID subunit 1         | DP00081                            | 2129    |
| Streptophyta | Arabidopsis thaliana     | Auxin-responsive protein IAA7                           | DP01121                            | 243     |
|              |                          | Calvin cycle protein CP12-2, chloroplastic              | DP00534                            | 131     |
|              |                          | Dehydrin COR47                                          | DP00657                            | 265     |

Table S3: Optimized thresholds and accuracy of intrinsic disorder prediction in viral proteins for each predictor analysed. MCC = Matthews correlation coefficient; AUC = area under the receiver operator characteristic curve.

| Predictor       | MCC  | AUC  | Specificity | Sensitivity | Threshold |
|-----------------|------|------|-------------|-------------|-----------|
| ESpritz.Disprot | 0.46 | 0.85 | 0.64        | 0.90        | 0.29      |
| CSpritz.Long    | 0.45 | 0.85 | 0.57        | 0.92        | 0.34      |
| SPOT.Disorder2  | 0.42 | 0.84 | 0.65        | 0.88        | 0.13      |
| CSpritz.Short   | 0.38 | 0.82 | 0.67        | 0.85        | 0.11      |
| PONDRFIT        | 0.37 | 0.80 | 0.57        | 0.88        | 0.50      |
| PONDR.VL3       | 0.36 | 0.78 | 0.56        | 0.88        | 0.54      |
| ESpritz.Xray    | 0.35 | 0.80 | 0.58        | 0.87        | 0.06      |
| Disprot.vslb    | 0.35 | 0.78 | 0.54        | 0.88        | 0.65      |
| PONDR.VSL2      | 0.35 | 0.78 | 0.54        | 0.88        | 0.65      |
| IUPRED2.short   | 0.34 | 0.79 | 0.57        | 0.87        | 0.47      |
| Disprot.vl3     | 0.34 | 0.79 | 0.53        | 0.88        | 0.68      |
| Disprot.vl3h    | 0.34 | 0.78 | 0.55        | 0.87        | 0.63      |
| IUPRED2.long    | 0.33 | 0.78 | 0.54        | 0.87        | 0.49      |
| Disprot.vl2     | 0.29 | 0.76 | 0.53        | 0.85        | 0.57      |
| ESpritz.NMR     | 0.27 | 0.74 | 0.52        | 0.84        | 0.36      |
| Disprot.vl2.S   | 0.24 | 0.73 | 0.53        | 0.81        | 0.54      |
| PONDR.VLXT      | 0.22 | 0.71 | 0.50        | 0.80        | 0.62      |
| Disprot.vl2.C   | 0.20 | 0.70 | 0.57        | 0.73        | 0.52      |
| PONDR.XL1       | 0.15 | 0.59 | 0.38        | 0.82        | 0.69      |
| Disprot.vl2.V   | 0.14 | 0.62 | 0.29        | 0.87        | 0.52      |
| PONDR.CAN       | 0.11 | 0.59 | 0.25        | 0.88        | 0.62      |

Table S4: Optimized thresholds and accuracy of intrinsic disorder prediction in non-viral proteins for each predictor analysed. MCC = Matthews correlation coefficient; AUC = area under the receiver operator characteristic curve.

| Predictor       | MCC  | AUC  | Specificity | Sensitivity | Threshold |
|-----------------|------|------|-------------|-------------|-----------|
| ESpritz.Disprot | 0.36 | 0.79 | 0.65        | 0.78        | 0.38      |
| ESpritz.Xray    | 0.35 | 0.77 | 0.73        | 0.70        | 0.06      |
| SPOT.Disorder2  | 0.34 | 0.77 | 0.70        | 0.73        | 0.24      |
| IUPRED2.short   | 0.33 | 0.76 | 0.72        | 0.69        | 0.42      |
| IUPRED2.long    | 0.32 | 0.76 | 0.72        | 0.69        | 0.47      |
| PONDRFIT        | 0.32 | 0.75 | 0.74        | 0.67        | 0.46      |
| PONDR.VSL2      | 0.30 | 0.74 | 0.76        | 0.63        | 0.62      |
| PONDR.VL3       | 0.28 | 0.74 | 0.78        | 0.59        | 0.51      |
| ESpritz.NMR     | 0.28 | 0.73 | 0.65        | 0.70        | 0.39      |
| CSpritz.Long    | 0.26 | 0.71 | 0.83        | 0.51        | 0.21      |
| PONDR.VLXT      | 0.23 | 0.69 | 0.70        | 0.60        | 0.41      |
| PONDR.XL1       | 0.18 | 0.64 | 0.56        | 0.67        | 0.62      |
| PONDR.CAN       | 0.13 | 0.60 | 0.51        | 0.65        | 0.34      |

## References

- [1] Necci M, Piovesan D, Dosztányi Z, Tompa P, Tosatto SC. A comprehensive assessment of long intrinsic protein disorder from the DisProt database. *Bioinformatics*. 2018;34(3):445–452.
- [2] Uversky VN. Intrinsically disordered proteins and their ‘mysterious’ (meta) physics. *Frontiers in Physics*. 2019;7:10.
- [3] Lichtenthaler FW. 100 Years “Schlüssel-Schloss-Prinzip”: What made Emil Fischer use this analogy? *Angewandte Chemie International Edition in English*. 1995;33(23-24):2364–2374.
- [4] Wright PE, Dyson HJ. Intrinsically unstructured proteins: re-assessing the protein structure-function paradigm. *Journal of molecular biology*. 1999;293(2):321–331.
- [5] Kozlowski LP, Bujnicki JM. MetaDisorder: a meta-server for the prediction of intrinsic disorder in proteins. *BMC bioinformatics*. 2012;13(1):111.
- [6] Katuwawala A, Oldfield C, Kurgan L. Accuracy of protein-level disorder predictions. *Brief Bioinform*. 2019;46:48.
- [7] Uversky VN, Oldfield CJ, Dunker AK. Intrinsically disordered proteins in human diseases: introducing the D2 concept. *Annu Rev Biophys*. 2008;37:215–246.
- [8] Hu G, Wu Z, Wang K, N Uversky V, Kurgan L. Untapped potential of disordered proteins in current druggable human proteome. *Current drug targets*. 2016;17(10):1198–1205.
- [9] Gitlin L, Hagai T, LaBarbera A, Solovey M, Andino R. Rapid evolution of virus sequences in intrinsically disordered protein regions. *PLoS pathogens*. 2014;10(12).
- [10] Xue B, Blocquel D, Habchi J, Uversky AV, Kurgan L, Uversky VN, et al. Structural disorder in viral proteins. *Chemical reviews*. 2014;114(13):6880–6911.

- [11] Mishra PM, Verma NC, Rao C, Uversky VN, Nandi CK. Intrinsically disordered proteins of viruses: Involvement in the mechanism of cell regulation and pathogenesis. *Progress in Molecular Biology and Translational Science*. 2020;.
- [12] Walter J, Charon J, Hu Y, Lachat J, Leger T, Lafforgue G, et al. Comparative analysis of mutational robustness of the intrinsically disordered viral protein VPg and of its interactor eIF4E. *PloS one*. 2019;14(2):e0211725.
- [13] Sanjuán R, Nebot MR, Chirico N, Mansky LM, Belshaw R. Viral mutation rates. *Journal of virology*. 2010;84(19):9733–9748.
- [14] Tokuriki N, Oldfield CJ, Uversky VN, Berezovsky IN, Tawfik DS. Do viral proteins possess unique biophysical features? *Trends in biochemical sciences*. 2009;34(2):53–59.
- [15] Cotmore SF, Tattersall P, Kerr J, Bloom M, Parrish R, Linden C. Structure and organization of the viral genome. *Parvoviruses* Hodder Arnold, London, United Kingdom. 2005;p. 73–94.
- [16] Holmes EC. The evolutionary genetics of emerging viruses. *Annu Rev Ecol Evol Syst*. 2009;40:353–372.
- [17] Belshaw R, Pybus OG, Rambaut A. The evolution of genome compression and genomic novelty in RNA viruses. *Genome research*. 2007;17(10):1496–1504.
- [18] Rancurel C, Khosravi M, Dunker AK, Romero PR, Karlin D. Overlapping genes produce proteins with unusual sequence properties and offer insight into de novo protein creation. *Journal of virology*. 2009;83(20):10719–10736.
- [19] Ferreón ACM, Moran CR, Gambin Y, Deniz AA. Single-molecule fluorescence studies of intrinsically disordered proteins. In: *Methods in enzymology*. vol. 472. Elsevier; 2010. p. 179–204.

- [20] DeForte S, Uversky VN. Resolving the ambiguity: Making sense of intrinsic disorder when PDB structures disagree. *Protein Science*. 2016;25(3):676–688.
- [21] Dunker AK, Lawson JD, Brown CJ, Williams RM, Romero P, Oh JS, et al. Intrinsically disordered protein. *Journal of molecular graphics and modelling*. 2001;19(1):26–59.
- [22] Uversky VN. What does it mean to be natively unfolded? *European Journal of Biochemistry*. 2002;269(1):2–12.
- [23] Liu Y, Wang X, Liu B. A comprehensive review and comparison of existing computational methods for intrinsically disordered protein and region prediction. *Briefings in bioinformatics*. 2019;20(1):330–346.
- [24] Atkins JD, Boateng SY, Sorensen T, McGuffin LJ. Disorder prediction methods, their applicability to different protein targets and their usefulness for guiding experimental studies. *International journal of molecular sciences*. 2015;16(8):19040–19054.
- [25] Li J, Feng Y, Wang X, Li J, Liu W, Rong L, et al. An overview of predictors for intrinsically disordered proteins over 2010–2014. *International journal of molecular sciences*. 2015;16(10):23446–23462.
- [26] Piovesan D, Tabaro F, Mičetić I, Necci M, Quaglia F, Oldfield CJ, et al. DisProt 7.0: a major update of the database of disordered proteins. *Nucleic acids research*. 2017;45(D1):D219–D227.
- [27] Hatos A, Hajdu-Soltész B, Monzon AM, Palopoli N, Álvarez L, Aykac-Fas B, et al. DisProt: intrinsic protein disorder annotation in 2020. *Nucleic acids research*. 2020;48(D1):D269–D276.
- [28] DisProt;. Available from: <https://www.disprot.org/>.

- [29] Nielsen JT, Mulder FA. Quality and bias of protein disorder predictors. *Scientific reports*. 2019;9(1):5137.
- [30] Hanson J, Paliwal KK, Litfin T, Zhou Y. SPOT-Disorder2: Improved Protein Intrinsic Disorder Prediction by Ensembled Deep Learning. *Genomics, proteomics & bioinformatics*. 2019;17(6):645–656.
- [31] Xue B, Dunbrack RL, Williams RW, Dunker AK, Uversky VN. PONDR-FIT: a meta-predictor of intrinsically disordered amino acids. *Biochimica et Biophysica Acta (BBA)-Proteins and Proteomics*. 2010;1804(4):996–1010.
- [32] Mészáros B, Erdős G, Dosztányi Z. IUPred2A: context-dependent prediction of protein disorder as a function of redox state and protein binding. *Nucleic acids research*. 2018;46(W1):W329–W337.
- [33] Peng K, Radivojac P, Vucetic S, Dunker AK, Obradovic Z. Length-dependent prediction of protein intrinsic disorder. *BMC bioinformatics*. 2006;7(1):208.
- [34] Vucetic S, Brown CJ, Dunker AK, Obradovic Z. Flavors of protein disorder. *Proteins: Structure, Function, and Bioinformatics*. 2003;52(4):573–584.
- [35] Walsh I, Martin AJ, Di Domenico T, Vullo A, Pollastri G, Tosatto SC. CSpritz: accurate prediction of protein disorder segments with annotation for homology, secondary structure and linear motifs. *Nucleic acids research*. 2011;39(suppl\_2):W190–W196.
- [36] Walsh I, Martin AJ, Di Domenico T, Tosatto SC. ESpritz: accurate and fast prediction of protein disorder. *Bioinformatics*. 2012;28(4):503–509.
- [37] ChromeDriver: WebDriver for Chrome;. Available from: <https://chromedriver.chromium.org/>.

- [38] Pedregosa F, Varoquaux G, Gramfort A, Michel V, Thirion B, Grisel O, et al. Scikit-learn: Machine learning in Python. *the Journal of machine Learning research*. 2011;12:2825–2830.
- [39] Breiman L. Random forests. *Machine learning*. 2001;45(1):5–32.
- [40] Hastie T, Tibshirani R, Friedman J. *The Elements of Statistical Learning*. Springer Series in Statistics. New York, NY, USA: Springer New York Inc.; 2001.
- [41] Japkowicz N. The class imbalance problem: Significance and strategies. In: *Proc. of the Int’l Conf. on Artificial Intelligence*. vol. 56. Citeseer; 2000. .
- [42] Hemmerich J, Asilar E, Ecker GF. COVER: conformational oversampling as data augmentation for molecules. *Journal of Cheminformatics*. 2020;12(1):1–12.
- [43] Lemaître G, Nogueira F, Aridas CK. Imbalanced-learn: A python toolbox to tackle the curse of imbalanced datasets in machine learning. *The Journal of Machine Learning Research*. 2017;18(1):559–563.
- [44] Chawla NV, Bowyer KW, Hall LO, Kegelmeyer WP. SMOTE: synthetic minority over-sampling technique. *Journal of artificial intelligence research*. 2002;16:321–357.
- [45] Chang CC, Lin CJ. LIBSVM: A library for support vector machines. *ACM transactions on intelligent systems and technology (TIST)*. 2011;2(3):1–27.
- [46] Boughorbel S, Jarray F, El-Anbari M. Optimal classifier for imbalanced data using Matthews Correlation Coefficient metric. *PloS one*. 2017;12(6):e0177678.
- [47] Hanson J, Yang Y, Paliwal K, Zhou Y. Improving protein disorder prediction by deep bidirectional long short-term memory recurrent neural networks. *Bioinformatics*. 2017;33(5):685–692.



- [48] Romero P, Obradovic Z, Li X, Garner EC, Brown CJ, Dunker AK. Sequence complexity of disordered protein. *Proteins: Structure, Function, and Bioinformatics*. 2001;42(1):38–48.
- [49] Attia A. Ensemble Prediction of Intrinsically Disordered Regions in Proteins. *BMC Bioinformatics*. 2012;13(1):111.
- [50] Yuen CK, Lam JY, Wong WM, Mak LF, Wang X, Chu H, et al. SARS-CoV-2 nsp13, nsp14, nsp15 and orf6 function as potent interferon antagonists. *Emerging Microbes & Infections*. 2020;p. 1–29.
- [51] Giri R, Bhardwaj T, Shegane M, Gehi BR, Kumar P, Gadhave K. Dark Proteome of Newly Emerged SARS-CoV-2 in Comparison with Human and Bat Coronaviruses. *bioRxiv*. 2020;.
